# Supplementary material
Source: Springer Nature journal article supplement (https://www.springermedizin.de/resource/supplementary/12967_2011_951_MOESM2_ESM.pdf/9577216)

**A****all patients**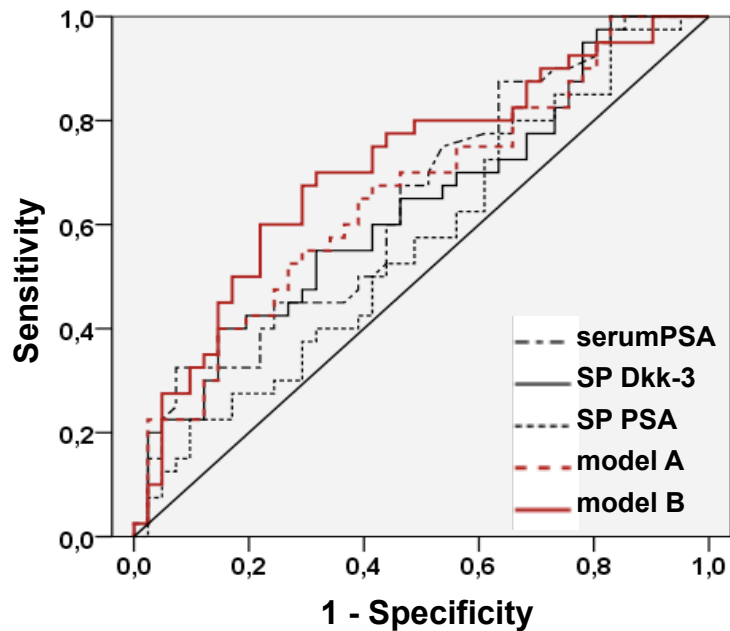**B****> 3 yr clinical follow-up**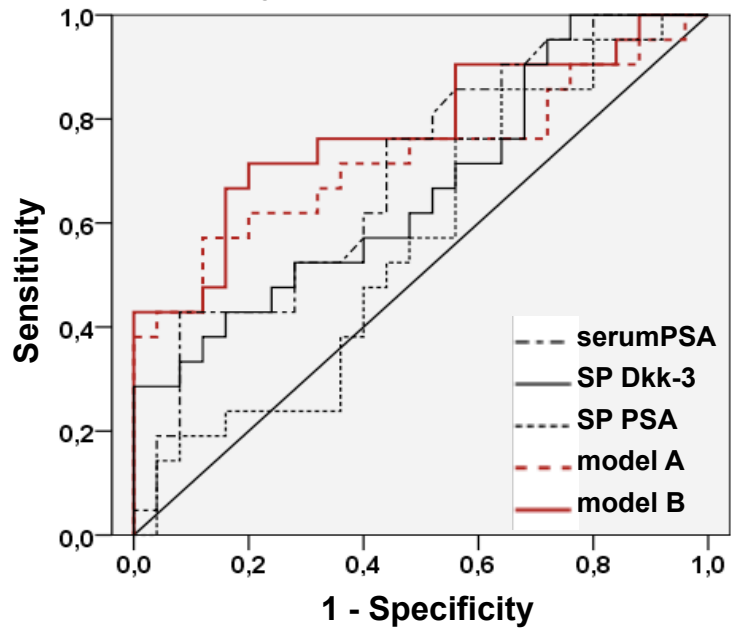

Supplement: MOESM2 [file 9577216]
